# Supplementary material
Source: MDPI journal article supplement (doi:10.3390/hospitals3020012)
Supplement: s1 [file hospitals-4189444-supplementary.pdf › hospitals-4189444-supplementary.pdf]

Supplementary Table S1. Coding tree – from raw data to themes.

| Raw data example (open code)                                       | Axial category → Theme                                                       |
|--------------------------------------------------------------------|------------------------------------------------------------------------------|
| Screws holes are misaligned (1-2mm)                                | Technical shortcoming → Attribution of fit-related issues                    |
| “There is a contour mismatch at orbital rim”                       | Technical shortcoming → Attribution of fit-related issues                    |
| “Soft tissue constraints ignored during virtual surgical planning” | Planning workflow failures → Attribution of fit-related issues               |
| “Poor DICOM segmentation”                                          | Planning workflow failures → Attribution of fit-related issues               |
| “Unexpected bone resorption/remodelling since scan”                | Anatomical changes → Attribution of fit-related issues                       |
| “This is BS, this thing doesn't fit”                               | Verbal expressions → Intraoperative frustration & impatience                 |
| “Why doesn't this [expletive] thing work?”                         | Verbal expressions → Intraoperative frustration & impatience                 |
| “Just bend the last three holes in”                                | Premature decisions → Intraoperative frustration & impatience                |
| “Can you open the angle up?”                                       | Premature decisions → Intraoperative frustration & impatience                |
| “Aggressive burring of the implant where it interfaces the bone”   | Physical manifestation → Intraoperative frustration & impatience             |
| “Instrument slamming”                                              | Physical manifestation → Intraoperative frustration & impatience             |
| “I don't know what the planner [biomedical engineer] did here”     | External/team-directed attribution → Intraoperative frustration & impatience |
| “Re-checked planning report”                                       | Protocol adherence → Emotional regulation and perseverance                   |
| “Re-sequenced steps”                                               | Protocol adherence → Emotional regulation and perseverance                   |
| “Called for bioengineer (to theatre/operating room) consult”       | Collaborative engagement → Emotional regulation and perseverance             |
| “Asked consultant and/or surgical technologist for suggestions”    | Collaborative engagement → Emotional regulation and perseverance             |
